# Supplementary material
Source: PubMed Central journal article supplement (PMC2568853)
Supplement: 10.3163.1536-5050.96.4.012.sg001.pdf [file 10.3163.1536-5050.96.4.012.sg001.pdf]

## Citation patterns of online and print journals in the digital age

Sandra L. De Groot, MLIS, AHIP

**Table 4**  
Average use of journals based on their age for urban and regional medical campuses

| <b>Age of journal article</b> | <b>% of use on urban campus</b> | <b>% of use on regional campus</b> |
|-------------------------------|---------------------------------|------------------------------------|
| Under 1 year                  | 1.7                             | 2.2                                |
| 1 year                        | 8.6                             | 7.0                                |
| 2 years                       | 10.9                            | 10.1                               |
| 3 years                       | 10.2                            | 10.0                               |
| 4 years                       | 9.1                             | 8.4                                |
| 5–6 years                     | 15.5                            | 15.0                               |
| 7–8 years                     | 11.7                            | 12.1                               |
| 9–10 years                    | 8.4                             | 8.7                                |
| 11–15 years                   | 12.1                            | 12.7                               |
| 16–20 years                   | 5.5                             | 5.3                                |
| 21–30 years                   | 4.3                             | 4.9                                |
| 31 years or older             | 2.0                             | 3.4                                |
